# Supplementary material for: Are Metallacyclopentadienes Always Non-Aromatic?
Source: MDPI journal article supplement (doi:10.3390/chemistry3040094), 2021-11-04
Supplement: s1 [file s1]

Supplementary Information for:  
Are Metallacyclopentadienes Always Non-Aromatic?

Ricardo Casiano-González and José Enrique Barquera-Lozada

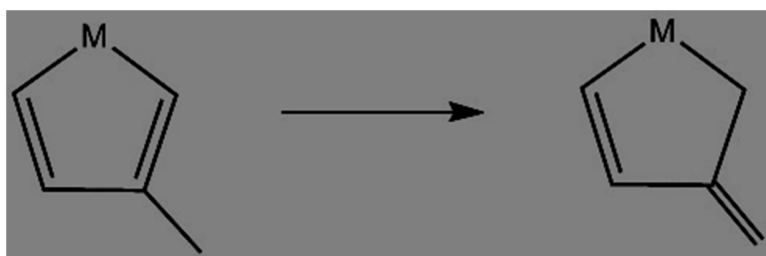

**Figure S1.** Isomeration reaction for the calculation of ISE.

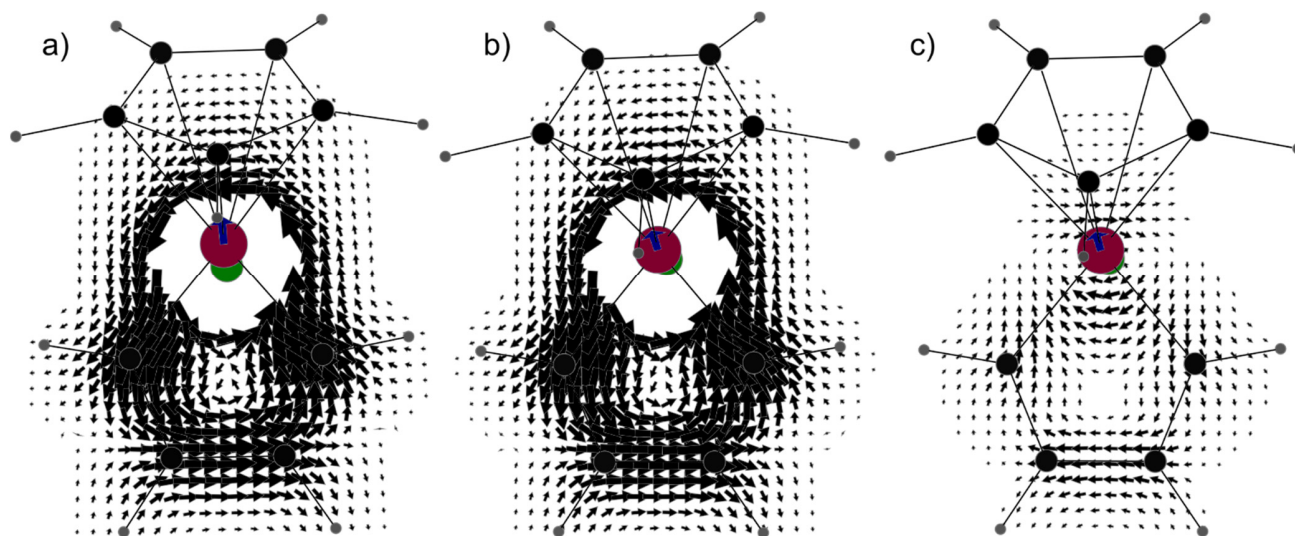

**Figure S2.** Maps of contributions to  $j(r)$  of a) HOMO-1 of complex **6** and its b) rotational and c) translational part.

**Table S1.** XYZ coordinates of the studied metallacyclopentadienes.

1. Energy: -1391.28233578

|    |               |               |               |
|----|---------------|---------------|---------------|
| Ti | 0.0009060000  | -0.0771670000 | 0.0001000000  |
| C  | -0.0454740000 | 1.5253970000  | 1.3834600000  |
| C  | -0.0391650000 | 2.7004960000  | 0.7344740000  |
| H  | -0.0670180000 | 3.6552100000  | 1.2573440000  |
| C  | -0.0079550000 | 2.7006710000  | -0.7346650000 |
| H  | 0.0028140000  | 3.6556470000  | -1.2576820000 |
| C  | 0.0200720000  | 1.5257890000  | -1.3834440000 |
| C  | -1.4984980000 | -1.9154730000 | 0.3821970000  |
| H  | -1.1016570000 | -2.8513980000 | 0.7417790000  |
| C  | -1.6074500000 | -1.5261270000 | -0.9738900000 |
| H  | -1.3263790000 | -2.1201950000 | -1.8290450000 |
| C  | -2.1581310000 | -0.2254650000 | -1.0076080000 |
| C  | -2.3585660000 | 0.1960110000  | 0.3219320000  |
| H  | -2.7206920000 | 1.1617110000  | 0.6307960000  |
| C  | -1.9557110000 | -0.8538010000 | 1.1791190000  |
| H  | -1.9583870000 | -0.8222780000 | 2.2573190000  |
| C  | 2.3522320000  | 0.2284770000  | -0.3456870000 |
| H  | 2.6985680000  | 1.1928720000  | -0.6757400000 |

|   |               |               |               |
|---|---------------|---------------|---------------|
| C | 1.9604040000  | -0.8444430000 | -1.1794270000 |
| H | 1.9544500000  | -0.8340180000 | -2.2580670000 |
| C | 1.5284590000  | -1.8983930000 | -0.3585650000 |
| H | 1.1448100000  | -2.8475900000 | -0.6970410000 |
| C | 1.6401990000  | -1.4811760000 | 0.9885370000  |
| H | 1.3753320000  | -2.0632620000 | 1.8570300000  |
| C | 2.1685930000  | -0.1705040000 | 0.9932590000  |
| H | 2.3805240000  | 0.4278670000  | 1.8626590000  |
| H | -2.3725960000 | 0.3530530000  | -1.8897650000 |
| H | 0.0617090000  | 1.5110850000  | -2.4709100000 |
| H | -0.0854720000 | 1.5102140000  | 2.4709790000  |

2. -588.862468297

|    |               |               |               |
|----|---------------|---------------|---------------|
| Zr | 0.0000250000  | -0.0294560000 | 0.0007900000  |
| C  | 0.0085160000  | 1.6531050000  | -1.4801070000 |
| C  | 0.0023460000  | 2.7791530000  | -0.7422030000 |
| H  | 0.0063690000  | 3.7630610000  | -1.2123380000 |
| C  | -0.0049960000 | 2.7798970000  | 0.7408710000  |
| H  | -0.0099480000 | 3.7643070000  | 1.2099570000  |
| C  | -0.0101210000 | 1.6546450000  | 1.4800420000  |
| C  | 1.6295710000  | -1.9290840000 | -0.4372140000 |
| H  | 1.2345660000  | -2.8524390000 | -0.8315890000 |
| C  | 1.7511730000  | -1.5962000000 | 0.9338210000  |
| H  | 1.4747990000  | -2.2254140000 | 1.7658000000  |
| C  | 2.3192130000  | -0.3054390000 | 1.0184560000  |
| H  | 2.5328500000  | 0.2376240000  | 1.9241890000  |
| C  | 2.5255720000  | 0.1660280000  | -0.2939960000 |
| H  | 2.9025120000  | 1.1385600000  | -0.5659940000 |
| C  | 2.1073280000  | -0.8409630000 | -1.1930020000 |
| H  | 2.1264140000  | -0.7721740000 | -2.2694670000 |
| C  | -2.1071200000 | -0.8440080000 | 1.1924620000  |
| C  | -1.6280430000 | -1.9309200000 | 0.4357260000  |
| C  | -1.7492800000 | -1.5966730000 | -0.9349900000 |
| H  | -1.2318900000 | -2.8541100000 | 0.8293060000  |
| C  | -2.3184020000 | -0.3063430000 | -1.0185400000 |
| H  | -1.4718890000 | -2.2247390000 | -1.7674960000 |
| C  | -2.5258010000 | 0.1635860000  | 0.2943190000  |
| H  | -2.5318080000 | 0.2375830000  | -1.9237830000 |
| H  | -2.1269800000 | -0.7764570000 | 2.2689820000  |
| H  | -2.9040210000 | 1.1353600000  | 0.5671740000  |
| H  | 0.0188160000  | 1.7616910000  | -2.5619670000 |
| H  | -0.0205370000 | 1.7646760000  | 2.5617540000  |

3. -631.869584213

|    |               |               |               |
|----|---------------|---------------|---------------|
| Nb | 0.0142280000  | -0.1326400000 | -0.0049500000 |
| C  | -2.1713560000 | 0.5197550000  | -0.0008720000 |
| C  | -1.1977360000 | -2.0331160000 | -0.0041460000 |

|   |               |               |               |
|---|---------------|---------------|---------------|
| C | -2.5266710000 | -1.8741380000 | -0.0123210000 |
| C | -3.0464160000 | -0.4918270000 | -0.0173110000 |
| H | -4.1228590000 | -0.3258840000 | -0.0309890000 |
| H | -2.5595620000 | 1.5349660000  | -0.0026890000 |
| H | -0.8136670000 | -3.0529400000 | -0.0027440000 |
| H | -3.2358610000 | -2.7010030000 | -0.0177750000 |
| C | -0.2313730000 | 1.4181140000  | 1.3759610000  |
| C | -0.2122480000 | 1.4492840000  | -1.3590210000 |
| C | 2.1287130000  | -0.2332380000 | 1.1557680000  |
| C | 2.3028020000  | 0.6026160000  | 0.0188850000  |
| C | 2.1460000000  | -0.2055830000 | -1.1400640000 |
| C | 1.9038120000  | -1.5329640000 | -0.7128760000 |
| H | 2.5446910000  | 1.6527120000  | 0.0335580000  |
| H | 2.2436800000  | 0.1230390000  | -2.1616890000 |
| O | -0.3711780000 | 2.3048850000  | -2.0889040000 |
| O | -0.4010520000 | 2.2585880000  | 2.1212840000  |
| C | 1.8935160000  | -1.5500210000 | 0.6931790000  |
| H | 1.7057770000  | -2.3761810000 | -1.3555870000 |
| H | 2.2113450000  | 0.0708310000  | 2.1862650000  |
| H | 1.6866930000  | -2.4083870000 | 1.3124820000  |

4. -1518.88175258

|   |               |               |               |
|---|---------------|---------------|---------------|
| V | 0.0864760000  | -0.1095660000 | -0.0031000000 |
| C | -2.0856900000 | 0.3932620000  | -0.0011530000 |
| C | -0.9281710000 | -1.9891890000 | -0.0039570000 |
| C | -2.2635450000 | -1.9885020000 | -0.0135340000 |
| C | -2.8985920000 | -0.6631530000 | -0.0190200000 |
| H | -3.9818030000 | -0.5602390000 | -0.0322030000 |
| H | -2.5114120000 | 1.3934310000  | -0.0016560000 |
| H | -0.4204960000 | -2.9531580000 | -0.0010540000 |
| H | -2.8768930000 | -2.8874460000 | -0.0190730000 |
| C | -0.3535140000 | 1.2761130000  | 1.3406430000  |
| C | -0.3393680000 | 1.3073510000  | -1.3227160000 |
| C | 2.0842110000  | -0.0927000000 | 1.1473920000  |
| C | 2.2063640000  | 0.7404960000  | 0.0058050000  |
| C | 2.0878920000  | -0.0814610000 | -1.1444570000 |
| C | 1.8872610000  | -1.4053560000 | -0.7100690000 |
| H | 2.3813050000  | 1.8039590000  | 0.0115110000  |
| H | 2.1474820000  | 0.2482570000  | -2.1688480000 |
| O | -0.6119370000 | 2.1028070000  | -2.0814080000 |
| O | -0.6341220000 | 2.0556530000  | 2.1132740000  |
| C | 1.8853830000  | -1.4121880000 | 0.6996560000  |
| H | 1.7060880000  | -2.2574250000 | -1.3448290000 |
| H | 2.1395340000  | 0.2270540000  | 2.1751740000  |
| H | 1.7023300000  | -2.2701450000 | 1.3258090000  |

5. -2072.07615297

|    |               |               |               |
|----|---------------|---------------|---------------|
| Fe | 0.0752840000  | -0.1742700000 | -0.0006360000 |
| C  | -1.2672670000 | 0.4495700000  | -1.2228920000 |
| C  | -1.2675800000 | 0.4468500000  | 1.2229940000  |
| C  | -2.4267360000 | 0.8916140000  | 0.7238340000  |
| C  | -2.4265540000 | 0.8932460000  | -0.7230540000 |
| H  | -3.2694650000 | 1.2109500000  | -1.3277280000 |
| H  | -1.0283590000 | 0.4000170000  | -2.2817990000 |
| H  | -1.0293140000 | 0.3941660000  | 2.2818930000  |
| H  | -3.2698880000 | 1.2077480000  | 1.3289970000  |
| C  | 2.2816870000  | -0.3489420000 | -0.0004620000 |
| C  | 1.8644490000  | 0.3694180000  | -1.1418160000 |
| C  | 1.1768180000  | 1.5296590000  | -0.7094990000 |
| H  | 1.9821510000  | 0.0545060000  | -2.1664700000 |
| C  | 1.1765540000  | 1.5279220000  | 0.7127770000  |
| C  | 1.8640750000  | 0.3666150000  | 1.1424840000  |
| H  | 1.9812770000  | 0.0490760000  | 2.1663830000  |
| H  | 2.7632300000  | -1.3129300000 | -0.0015510000 |
| H  | 0.7343200000  | 2.2821690000  | -1.3392630000 |
| H  | 0.7337930000  | 2.2788730000  | 1.3442140000  |
| Cl | -0.4357540000 | -2.2817220000 | -0.0008440000 |

6. -903.295121832

|    |               |               |               |
|----|---------------|---------------|---------------|
| Ru | -0.0268230000 | 0.1474270000  | 0.0004670000  |
| C  | 1.2890080000  | -0.5936590000 | 1.2218140000  |
| C  | 1.2899420000  | -0.5903250000 | -1.2220310000 |
| C  | 2.4454540000  | -1.0984810000 | -0.7089290000 |
| C  | 2.4449190000  | -1.1003140000 | 0.7080270000  |
| H  | 1.0692300000  | -0.6279430000 | 2.2866560000  |
| H  | 3.2593020000  | -1.4789360000 | 1.3153480000  |
| H  | 1.0707720000  | -0.6218340000 | -2.2870910000 |
| H  | 3.2601390000  | -1.4758320000 | -1.3166130000 |
| Cl | 0.7129010000  | 2.3280860000  | 0.0008830000  |
| C  | -2.3503880000 | 0.2235740000  | 0.6986340000  |
| C  | -1.6345480000 | -0.9286990000 | 1.1401870000  |
| C  | -1.2417580000 | -1.6795610000 | -0.0018170000 |
| H  | -1.4624280000 | -1.2118450000 | 2.1661300000  |
| C  | -1.6337560000 | -0.9261150000 | -1.1423470000 |
| C  | -2.3499190000 | 0.2251410000  | -0.6985320000 |
| H  | -2.7464190000 | 1.0015090000  | -1.3335200000 |
| H  | -2.7475820000 | 0.9983720000  | 1.3350830000  |
| H  | -0.7347740000 | -2.6301410000 | -0.0027540000 |
| H  | -1.4610760000 | -1.2069430000 | -2.1688310000 |

7. -1650.54743988

|    |               |               |               |
|----|---------------|---------------|---------------|
| Fe | -0.1046680000 | -0.0000110000 | -0.1526380000 |
| C  | -1.5878370000 | -1.3282000000 | -0.0077180000 |
| C  | -1.5878150000 | 1.3282480000  | -0.0076110000 |

|   |               |               |               |
|---|---------------|---------------|---------------|
| C | -2.7901180000 | 0.7438770000  | -0.0397620000 |
| C | -2.7901400000 | -0.7438140000 | -0.0397150000 |
| H | -3.7352750000 | -1.2863260000 | -0.0482640000 |
| H | -1.5276050000 | -2.4171520000 | 0.0013460000  |
| H | -1.5275300000 | 2.4171950000  | 0.0011830000  |
| H | -3.7352490000 | 1.2864010000  | -0.0485810000 |
| H | 1.0974020000  | 1.2339620000  | 2.2065980000  |
| C | 1.3512750000  | 0.6981600000  | 1.3041370000  |
| C | 1.3514790000  | -0.6998950000 | 1.3031760000  |
| H | 1.0977120000  | -1.2369900000 | 2.2049030000  |
| C | 1.5933640000  | -1.4070650000 | 0.1095490000  |
| H | 1.5324400000  | -2.4852510000 | 0.0998980000  |
| C | 1.7851780000  | -0.7056130000 | -1.0780730000 |
| H | 1.8828360000  | -1.2403620000 | -2.0119360000 |
| C | 1.7851530000  | 0.7073090000  | -1.0770910000 |
| H | 1.8827850000  | 1.2433790000  | -2.0101970000 |
| C | 1.5931080000  | 1.4070310000  | 0.1114830000  |
| H | 1.5319650000  | 2.4852190000  | 0.1033860000  |

8. -481.724694879

|    |               |               |               |
|----|---------------|---------------|---------------|
| Ru | -0.2040850000 | 0.0002910000  | 0.0009950000  |
| C  | -1.5916720000 | -1.2041870000 | 0.0005520000  |
| C  | -1.5922560000 | 1.2048390000  | 0.0003010000  |
| C  | -2.9774570000 | 0.6691520000  | -0.0006310000 |
| C  | -2.9771750000 | -0.6691410000 | 0.0001800000  |
| H  | -3.8656260000 | -1.2905490000 | 0.0001400000  |
| H  | -1.5023490000 | -2.2970880000 | -0.0015150000 |
| H  | -1.5034990000 | 2.2977500000  | 0.0007380000  |
| H  | -3.8662260000 | 1.2901070000  | -0.0015550000 |
| H  | 1.8495990000  | 2.1533220000  | 1.2351600000  |
| C  | 1.8192420000  | 1.2182700000  | 0.6931270000  |
| C  | 1.6874590000  | -0.0008320000 | 1.4028220000  |
| H  | 1.6685270000  | -0.0012640000 | 2.4822180000  |
| C  | 1.8171190000  | -1.2196320000 | 0.6921570000  |
| H  | 1.8456990000  | -2.1551460000 | 1.2334960000  |
| C  | 1.8151450000  | -1.2191890000 | -0.6953550000 |
| H  | 1.8421000000  | -2.1543010000 | -1.2374600000 |
| C  | 1.6831180000  | 0.0001670000  | -1.4046410000 |
| H  | 1.6610360000  | 0.0006090000  | -2.4839780000 |
| C  | 1.8172260000  | 1.2188010000  | -0.6943790000 |
| H  | 1.8459680000  | 2.1542510000  | -1.2358090000 |

9. -2349.26160760

|    |               |               |               |
|----|---------------|---------------|---------------|
| Ni | -0.0967800000 | 0.0000610000  | -0.0011950000 |
| C  | 1.3662350000  | 1.3252950000  | -0.0001700000 |
| C  | 1.3636040000  | -1.3286470000 | -0.0009420000 |
| C  | 2.5643820000  | -0.7400900000 | 0.0006570000  |

|   |               |               |               |
|---|---------------|---------------|---------------|
| C | 2.5658240000  | 0.7342760000  | 0.0012940000  |
| H | 3.5070570000  | 1.2822180000  | 0.0027460000  |
| H | 1.3356550000  | 2.4175210000  | 0.0006200000  |
| H | 1.3305350000  | -2.4207930000 | -0.0016180000 |
| H | 3.5045750000  | -1.2898150000 | 0.0013410000  |
| P | -1.4530320000 | 1.8629740000  | 0.0002790000  |
| H | -2.8561110000 | 1.9981610000  | 0.0000790000  |
| H | -1.1797270000 | 2.7426440000  | -1.0570450000 |
| P | -1.4584120000 | -1.8595760000 | 0.0006390000  |
| H | -1.1887270000 | -2.7413930000 | -1.0557610000 |
| H | -2.8619010000 | -1.9897730000 | 0.0008910000  |
| H | -1.1809280000 | 2.7387990000  | 1.0610720000  |
| H | -1.1891990000 | -2.7352440000 | 1.0623330000  |

10. -968.836783688

|    |               |               |               |
|----|---------------|---------------|---------------|
| Pd | -0.0891410000 | -0.0000040000 | -0.0000040000 |
| C  | 1.4844110000  | 1.3112190000  | 0.0000050000  |
| C  | 1.4845360000  | -1.3111270000 | -0.0000130000 |
| C  | 2.6893810000  | -0.7327400000 | 0.0000020000  |
| C  | 2.6893150000  | 0.7329540000  | 0.0000100000  |
| H  | 3.6178310000  | 1.3001790000  | 0.0000110000  |
| H  | 1.3984830000  | 2.3976980000  | -0.0000030000 |
| H  | 1.3987260000  | -2.3976150000 | -0.0000210000 |
| H  | 3.6179560000  | -1.2998710000 | 0.0000110000  |
| P  | -1.5040070000 | 1.9270200000  | 0.0000000000  |
| H  | -2.9092490000 | 2.0161390000  | 0.0000000000  |
| H  | -1.2707420000 | 2.8256740000  | -1.0536110000 |
| P  | -1.5038310000 | -1.9271290000 | 0.0000030000  |
| H  | -1.2706510000 | -2.8257240000 | -1.0536760000 |
| H  | -2.9090660000 | -2.0163520000 | 0.0001920000  |
| H  | -1.2707410000 | 2.8256540000  | 1.0536270000  |
| H  | -1.2703520000 | -2.8257850000 | 1.0535640000  |

11. -1586.15815206

|    |               |               |               |
|----|---------------|---------------|---------------|
| Cr | 0.1604160000  | 0.0438820000  | -0.0003560000 |
| C  | -1.4132840000 | -0.3370280000 | 1.2847280000  |
| C  | -1.4133260000 | -0.3381480000 | -1.2847770000 |
| C  | -2.5827950000 | -0.6753010000 | -0.7284180000 |
| C  | -2.5826260000 | -0.6750510000 | 0.7285910000  |
| H  | -3.4732060000 | -0.9220640000 | 1.2998720000  |
| H  | -1.2956550000 | -0.2756310000 | 2.3657370000  |
| H  | -1.2953410000 | -0.2787650000 | -2.3658740000 |
| H  | -3.4734800000 | -0.9226380000 | -1.2993840000 |
| C  | -0.6722020000 | 1.9928580000  | 0.7103920000  |
| C  | -0.6699950000 | 1.9933110000  | -0.7132160000 |
| C  | 0.6706430000  | 1.8918660000  | -1.1471250000 |
| H  | -1.5354580000 | 2.1117300000  | -1.3389510000 |

|   |               |               |               |
|---|---------------|---------------|---------------|
| C | 1.4876050000  | 1.8295960000  | 0.0018910000  |
| C | 0.6672980000  | 1.8915170000  | 1.1482890000  |
| H | 0.9948470000  | 1.8338080000  | 2.1732930000  |
| H | -1.5393650000 | 2.1121390000  | 1.3335840000  |
| H | 1.0013630000  | 1.8347540000  | -2.1711460000 |
| H | 2.5590830000  | 1.7132240000  | 0.0035600000  |
| C | 2.0552040000  | -1.0211370000 | -0.7072160000 |
| C | 2.0486520000  | -1.0248980000 | 0.7180630000  |
| C | 0.9319560000  | -1.7457560000 | 1.1472350000  |
| H | 2.7616970000  | -0.5244710000 | 1.3533600000  |
| C | 0.2153720000  | -2.1610220000 | -0.0063060000 |
| C | 0.9425030000  | -1.7392060000 | -1.1509790000 |
| H | 0.6487190000  | -1.8979950000 | -2.1745120000 |
| H | 2.7740630000  | -0.5171240000 | -1.3330630000 |
| H | 0.6289240000  | -1.9111010000 | 2.1669960000  |
| H | -0.7162100000 | -2.6986490000 | -0.0118350000 |

12. -609.942886556

|    |               |               |               |
|----|---------------|---------------|---------------|
| Mo | -0.0002870000 | 0.1917700000  | -0.0000720000 |
| C  | 0.0020150000  | -1.5340950000 | 1.3153460000  |
| C  | 0.0018380000  | -1.5342030000 | -1.3153210000 |
| C  | 0.0035720000  | -2.7395810000 | -0.7296550000 |
| C  | 0.0036920000  | -2.7395170000 | 0.7297660000  |
| H  | 0.0051600000  | -3.6733700000 | 1.2871860000  |
| H  | 0.0019190000  | -1.4480800000 | 2.4011590000  |
| H  | 0.0016450000  | -1.4482570000 | -2.4011390000 |
| H  | 0.0049580000  | -3.6734860000 | -1.2869880000 |
| C  | -2.2259650000 | -0.1524710000 | 0.7072980000  |
| C  | -2.2261090000 | -0.1525330000 | -0.7069700000 |
| C  | -1.7707080000 | 1.1104070000  | -1.1594830000 |
| H  | -2.5182900000 | -0.9795780000 | -1.3293700000 |
| C  | -1.4933580000 | 1.8914830000  | 0.0000240000  |
| C  | -1.7704620000 | 1.1104850000  | 1.1596120000  |
| H  | -1.6873820000 | 1.4257230000  | 2.1858450000  |
| H  | -2.5180290000 | -0.9794710000 | 1.3298110000  |
| H  | -1.6878210000 | 1.4255700000  | -2.1857540000 |
| H  | -1.1646670000 | 2.9166190000  | -0.0000300000 |
| C  | 1.4886670000  | 1.8952460000  | -0.0009830000 |
| C  | 1.7676380000  | 1.1157770000  | 1.1592130000  |
| C  | 2.2261790000  | -0.1463850000 | 0.7078540000  |
| H  | 1.6835880000  | 1.4315040000  | 2.1852170000  |
| C  | 2.2263590000  | -0.1474790000 | -0.7064270000 |
| C  | 1.7680010000  | 1.1140510000  | -1.1598660000 |
| H  | 1.6844530000  | 1.4282480000  | -2.1863790000 |
| H  | 1.1571900000  | 2.9194950000  | -0.0018260000 |
| H  | 2.5204040000  | -0.9721340000 | 1.3310070000  |
| H  | 2.5207780000  | -0.9742060000 | -1.3281840000 |



13. -2117.60542740

|    |               |               |               |
|----|---------------|---------------|---------------|
| Cr | -0.1372550000 | -0.0473280000 | -0.0000530000 |
| C  | 1.3279370000  | 0.8074560000  | 1.3122650000  |
| C  | 1.3280870000  | 0.8081790000  | -1.3117130000 |
| C  | 2.3575540000  | 1.4467800000  | -0.7255530000 |
| C  | 2.3574600000  | 1.4463940000  | 0.7265640000  |
| H  | 3.1208320000  | 1.9890740000  | 1.2823150000  |
| H  | 1.2623370000  | 0.8827680000  | 2.4031620000  |
| H  | 1.2626180000  | 0.8839680000  | -2.4025820000 |
| H  | 3.1210200000  | 1.9897300000  | -1.2809130000 |
| H  | -2.7161120000 | -1.1669340000 | -1.2363570000 |
| C  | -2.2950250000 | -0.3292730000 | -0.6969810000 |
| C  | -2.2950280000 | -0.3291740000 | 0.6971840000  |
| H  | -2.7160840000 | -1.1667840000 | 1.2366690000  |
| C  | -1.6820320000 | 0.7242520000  | 1.3994520000  |
| H  | -1.6274270000 | 0.6999520000  | 2.4783660000  |
| C  | -1.1566480000 | 1.8320010000  | 0.6976800000  |
| H  | -0.7061030000 | 2.6498780000  | 1.2384310000  |
| C  | -1.1568430000 | 1.8320060000  | -0.6977610000 |
| H  | -0.7064480000 | 2.6499010000  | -1.2386150000 |
| C  | -1.6822130000 | 0.7241960000  | -1.3994040000 |
| H  | -1.6277790000 | 0.6998610000  | -2.4783250000 |
| P  | 0.5670530000  | -1.6667420000 | -1.5418260000 |
| H  | 0.0535200000  | -2.9852590000 | -1.7006090000 |
| H  | 1.9169530000  | -2.0473360000 | -1.4710690000 |
| P  | 0.5665670000  | -1.6674900000 | 1.5412170000  |
| H  | 0.5312830000  | -1.3367990000 | 2.9073620000  |
| H  | 1.9164960000  | -2.0480130000 | 1.4706820000  |
| H  | 0.5321920000  | -1.3354620000 | -2.9078240000 |
| H  | 0.0530200000  | -2.9860870000 | 1.6993130000  |

14. -1141.36970977

|    |               |               |               |
|----|---------------|---------------|---------------|
| Mo | 0.1163890000  | 0.0196540000  | 0.0340510000  |
| C  | -1.3410680000 | -1.5217170000 | 0.5676720000  |
| C  | -1.2963070000 | -0.0469730000 | -1.5990430000 |
| C  | -2.2789230000 | -0.9799240000 | -1.5371910000 |
| C  | -2.2945030000 | -1.7939460000 | -0.3495540000 |
| H  | -3.0257240000 | -2.5886460000 | -0.2179440000 |
| H  | -1.3068870000 | -2.1201080000 | 1.4787060000  |
| H  | -1.2516050000 | 0.5293520000  | -2.5271320000 |
| H  | -2.9969760000 | -1.1408220000 | -2.3375210000 |
| H  | 2.5773880000  | 1.5352400000  | 1.0493980000  |
| C  | 2.2398450000  | 0.6178190000  | 0.5900040000  |
| C  | 2.0353160000  | -0.5467200000 | 1.3835930000  |
| H  | 2.1673740000  | -0.5042820000 | 2.4558980000  |
| C  | 1.5809640000  | -1.7052520000 | 0.7822420000  |
| H  | 1.3177920000  | -2.5604910000 | 1.3885550000  |

|   |               |               |               |
|---|---------------|---------------|---------------|
| C | 1.3580290000  | -1.7590630000 | -0.6345550000 |
| H | 0.9516040000  | -2.6498860000 | -1.0877490000 |
| C | 1.8456280000  | -0.7014830000 | -1.4396120000 |
| H | 1.8024130000  | -0.7780150000 | -2.5168120000 |
| C | 2.2661390000  | 0.4778830000  | -0.8373700000 |
| H | 2.5698760000  | 1.3128300000  | -1.4559910000 |
| P | -0.3266450000 | 2.3048260000  | -0.6440400000 |
| H | 0.5426630000  | 3.3736930000  | -0.3127480000 |
| H | -1.5129610000 | 2.9300880000  | -0.2148330000 |
| P | -1.3695560000 | 0.6572450000  | 1.7498680000  |
| H | -1.5481550000 | -0.1639700000 | 2.8756060000  |
| H | -2.7229660000 | 0.8363810000  | 1.3946850000  |
| H | -0.4519040000 | 2.6046260000  | -2.0122040000 |
| H | -1.2479720000 | 1.8837290000  | 2.4654060000  |

15. -1993.71135616

|    |               |               |               |
|----|---------------|---------------|---------------|
| Fe | 0.0880180000  | -0.0682220000 | -0.0001820000 |
| C  | -1.2842290000 | 0.5869550000  | 1.3088330000  |
| C  | -1.2846870000 | 0.5866120000  | -1.3091780000 |
| C  | -2.3431190000 | 1.1863080000  | -0.7316490000 |
| C  | -2.3428260000 | 1.1865920000  | 0.7315580000  |
| H  | -3.1697960000 | 1.6287430000  | 1.2849660000  |
| H  | -1.2509050000 | 0.5402930000  | 2.4003550000  |
| H  | -1.2522770000 | 0.5389390000  | -2.4006720000 |
| H  | -3.1705330000 | 1.6279040000  | -1.2848490000 |
| H  | 2.1963950000  | -1.8518840000 | -1.2468550000 |
| C  | 2.0414640000  | -0.9272750000 | -0.7089290000 |
| C  | 1.7904110000  | 0.2471710000  | -1.4017150000 |
| H  | 1.7311480000  | 0.2395040000  | -2.4803720000 |
| C  | 1.5265570000  | 1.4468360000  | -0.6939700000 |
| H  | 1.2584960000  | 2.3413810000  | -1.2357470000 |
| C  | 1.5261460000  | 1.4469780000  | 0.6937670000  |
| H  | 1.2575540000  | 2.3416150000  | 1.2351360000  |
| C  | 1.7892430000  | 0.2474570000  | 1.4020210000  |
| H  | 1.7285940000  | 0.2400280000  | 2.4805990000  |
| C  | 2.0408080000  | -0.9271750000 | 0.7096980000  |
| H  | 2.1951520000  | -1.8517070000 | 1.2479150000  |
| P  | -1.2907690000 | -1.8280360000 | 0.0000710000  |
| H  | -2.6512390000 | -1.5220720000 | -0.0000440000 |
| H  | -1.2790750000 | -2.7803360000 | 1.0445650000  |
| H  | -1.2790420000 | -2.7808550000 | -1.0439530000 |

16. -824.945894379

|    |               |               |               |
|----|---------------|---------------|---------------|
| Ru | 0.0603690000  | -0.0508630000 | -0.0141410000 |
| C  | -1.4315470000 | 0.4528320000  | 1.2873230000  |
| C  | -1.3594650000 | 0.7286990000  | -1.2445690000 |
| C  | -2.4760240000 | 1.2185950000  | -0.6735340000 |

|   |               |               |               |
|---|---------------|---------------|---------------|
| C | -2.5176610000 | 1.0584840000  | 0.7704620000  |
| H | -3.3604150000 | 1.3927880000  | 1.3685290000  |
| H | -1.3685650000 | 0.2582180000  | 2.3576120000  |
| H | -1.2338640000 | 0.7740330000  | -2.3261500000 |
| H | -3.2863990000 | 1.6790680000  | -1.2306520000 |
| H | 2.1409870000  | -0.7688100000 | -2.2263500000 |
| C | 2.0278340000  | -0.3188290000 | -1.2516350000 |
| C | 2.1022740000  | -1.1052480000 | -0.0824310000 |
| H | 2.2714260000  | -2.1702500000 | -0.1706240000 |
| C | 2.0050410000  | -0.5251200000 | 1.2008550000  |
| H | 2.0976930000  | -1.1342470000 | 2.0875010000  |
| C | 1.7019290000  | 0.8428770000  | 1.3026400000  |
| H | 1.5459040000  | 1.2867150000  | 2.2760030000  |
| C | 1.5851080000  | 1.6461520000  | 0.1473900000  |
| H | 1.3301870000  | 2.6913310000  | 0.2330650000  |
| C | 1.7248100000  | 1.0474110000  | -1.1238350000 |
| H | 1.5821270000  | 1.6488950000  | -2.0108000000 |
| P | -1.2948700000 | -1.7816420000 | -0.0925440000 |
| H | -2.6523710000 | -1.5417740000 | -0.3302780000 |
| H | -1.3946710000 | -2.6255570000 | 1.0304630000  |
| H | -1.0790290000 | -2.8029000000 | -1.0439620000 |

17. -1895.21145582

|    |               |               |               |
|----|---------------|---------------|---------------|
| Ni | 0.2510120000  | 0.0005580000  | 0.0007040000  |
| C  | 1.6709510000  | -1.2989790000 | 0.0000510000  |
| C  | 1.6715350000  | 1.2995970000  | 0.0001120000  |
| C  | 2.8841960000  | 0.7376930000  | -0.0004060000 |
| C  | 2.8838550000  | -0.7376380000 | -0.0004290000 |
| H  | 3.8159870000  | -1.2999450000 | -0.0009060000 |
| H  | 1.5612080000  | -2.3840210000 | 0.0001280000  |
| H  | 1.5623210000  | 2.3846760000  | 0.0002300000  |
| H  | 3.8165720000  | 1.2995960000  | -0.0006440000 |
| H  | -1.7417690000 | -0.5134780000 | -2.4306450000 |
| C  | -1.7522050000 | -0.2878390000 | -1.3738630000 |
| C  | -1.7085460000 | -1.3201230000 | -0.4348800000 |
| H  | -1.6512720000 | -2.3474800000 | -0.7665190000 |
| C  | -1.7261270000 | -1.0355970000 | 0.9350450000  |
| H  | -1.6870410000 | -1.8442030000 | 1.6513110000  |
| C  | -1.7533800000 | 0.2869010000  | 1.3731480000  |
| H  | -1.7438810000 | 0.5124550000  | 2.4299570000  |
| C  | -1.7113900000 | 1.3191940000  | 0.4342630000  |
| H  | -1.6567340000 | 2.3467280000  | 0.7657990000  |
| C  | -1.7278110000 | 1.0345770000  | -0.9357850000 |
| H  | -1.6901880000 | 1.8433370000  | -1.6519570000 |

18. -514.782422399

|    |              |               |              |
|----|--------------|---------------|--------------|
| Pd | 0.7664610000 | -0.0269270000 | 0.0091420000 |
|----|--------------|---------------|--------------|

|   |               |               |               |
|---|---------------|---------------|---------------|
| C | 2.2737020000  | -1.2831800000 | -0.2667920000 |
| C | 3.5337580000  | 0.6500440000  | 0.1132240000  |
| H | 4.4080600000  | -1.3776830000 | -0.3137970000 |
| H | 2.0625630000  | -2.3295660000 | -0.4791770000 |
| H | -1.5732590000 | -2.4595990000 | 0.2638000000  |
| C | -1.5823820000 | -1.3821440000 | 0.1682630000  |
| C | -1.5823750000 | -0.5829420000 | 1.3112530000  |
| H | -1.5710900000 | -1.0385480000 | 2.2918030000  |
| C | 2.3165660000  | 1.1857660000  | 0.2383540000  |
| C | 3.5089300000  | -0.7821440000 | -0.1798640000 |
| H | 4.4532710000  | 1.2196290000  | 0.2180370000  |
| H | 2.1417950000  | 2.2377000000  | 0.4560470000  |
| H | -1.5293580000 | 2.4659300000  | -0.1799300000 |
| C | -1.5577510000 | 1.3888030000  | -0.0839850000 |
| C | -1.6058620000 | 0.5902710000  | -1.2261470000 |
| H | -1.6130920000 | 1.0458180000  | -2.2067660000 |
| H | -1.5262670000 | 1.4276050000  | 2.0665120000  |
| C | -1.5558170000 | 0.8034050000  | 1.1837470000  |
| H | -1.6102340000 | -1.4207800000 | -1.9822720000 |
| C | -1.6038900000 | -0.7964880000 | -1.0991210000 |

**Table S2.** CSD search of metallacyclopentadienes.

Number of structures 287

| Nfrag | Refcode  | TOR M1-C2-C3-C4 |
|-------|----------|-----------------|
| 1     | ADEXIQ   | -.682           |
| 2     | AGAHUL   | 7.438           |
| 3     | AJEBAU   | 2.561           |
| 4     | AJOGIP   | -2.954          |
| 5     | AJOGOV   | 1.593           |
| 6     | AKIMIR   | -1.859          |
| 7     | AKIMOX   | 1.213           |
| 8     | ASASIX   | 8.903           |
| 9     | ASODAN   | 16.388          |
| 10    | ATANIT   | -.556           |
| 11    | BACQAZ   | 2.018           |
| 12    | BAVDUY   | -4.527          |
| 13    | BEKVUK   | .725            |
| 14    | BEQLEQ   | -7.512          |
| 15    | BIXTOS   | -.382           |
| 16    | BODQUG   | -1.896          |
| 17    | BULPED   | -.996           |
| 18    | CATLIV   | -3.354          |
| 19    | CBFBNB10 | .000            |
| 20    | CEQFEJ   | -2.664          |
| 21    | CEXKUN   | .727            |
| 22    | CIFMUC   | 2.800           |
| 23    | COJS AV  | 3.729           |
| 24    | COJSEZ   | 5.303           |
| 25    | CPFPCO   | -3.977          |

|    |          |         |
|----|----------|---------|
| 26 | CPFPRH   | -4.573  |
| 27 | CPPHZR   | -8.055  |
| 28 | CPTPHF   | -4.667  |
| 29 | CPTPTI   | -4.834  |
| 30 | CSMRHC10 | -3.446  |
| 31 | CUPFEY   | 10.930  |
| 32 | DAMBIE   | 1.042   |
| 33 | DAMBOK   | 3.596   |
| 34 | DANDAA   | -2.340  |
| 35 | DAVZIJ   | -7.392  |
| 36 | DOZQEO   | -4.656  |
| 37 | DUGHAQ   | -7.008  |
| 38 | DUGHEU   | -4.449  |
| 39 | EBAWUA   | -1.684  |
| 40 | EFIPUE   | 10.828  |
| 41 | EFIPUE   | 7.359   |
| 42 | EKAFUR   | 6.962   |
| 43 | FEHFII   | 9.948   |
| 44 | FEZDUJ   | .632    |
| 45 | FEZDUJ   | 1.110   |
| 46 | FEZFAR   | -19.011 |
| 47 | FOPDOF   | -6.474  |
| 48 | FOSPOU   | .406    |
| 49 | FOZNOX   | 1.934   |
| 50 | FUDGUH   | -2.245  |
| 51 | FUDHAO   | 13.143  |
| 52 | FUDHIW   | -4.575  |
| 53 | FUDNEX   | 7.794   |
| 54 | GABJIC   | -8.619  |
| 55 | GABJIC   | .273    |
| 56 | GECWUG   | 2.812   |
| 57 | GIBWIY   | 3.690   |
| 58 | GIJRAV   | -3.169  |
| 59 | GIMVON   | -6.061  |
| 60 | GINJUI   | -4.729  |
| 61 | GINJUI10 | -4.729  |
| 62 | GIZGAZ   | 7.688   |
| 63 | GIZGON   | 2.509   |
| 64 | HABMOP   | -5.520  |
| 65 | HEHDIH   | -2.427  |
| 66 | HEJQOE   | 29.751  |
| 67 | HIJFUD   | -4.084  |
| 68 | HIJFUD   | -4.371  |
| 69 | HOCTAV   | 9.014   |
| 70 | HOCTEZ   | -6.321  |
| 71 | HONHEA   | 2.399   |
| 72 | HONHEA   | 5.835   |
| 73 | HOSGAY   | -.507   |
| 74 | HOSGAY   | .242    |

|     |          |        |
|-----|----------|--------|
| 75  | HOYPOB   | -8.578 |
| 76  | HUJCUK   | -5.124 |
| 77  | HULSOW   | -4.601 |
| 78  | HULSOW   | 4.634  |
| 79  | HXPAUP   | -5.166 |
| 80  | HXPAUP   | 10.918 |
| 81  | ICUKAS   | -3.658 |
| 82  | IDATAJ   | 4.023  |
| 83  | IDUYEN   | 1.750  |
| 84  | IFAVUG   | -3.355 |
| 85  | IFAVUG   | 4.246  |
| 86  | IFIZAA   | -1.312 |
| 87  | IHUTUA   | 1.442  |
| 88  | IRASEA   | -8.420 |
| 89  | IRAYIJ   | 3.169  |
| 90  | IRAYIJ   | 4.856  |
| 91  | JAJDUT   | .217   |
| 92  | JASCOY01 | -5.819 |
| 93  | JAYLEA   | -3.209 |
| 94  | JAYLIE   | -6.285 |
| 95  | JAYLOK   | -7.061 |
| 96  | JITZIV   | .495   |
| 97  | JOCSAV   | 2.057  |
| 98  | JOFWUY   | .877   |
| 99  | JOFXAF   | 1.145  |
| 100 | JOFXEJ   | .755   |
| 101 | JOFXIN   | .741   |
| 102 | JOFXOT   | .623   |
| 103 | JOFXUZ   | .591   |
| 104 | JOFYAG   | 3.879  |
| 105 | JOFYAG   | 8.253  |
| 106 | JOFYEK   | 2.464  |
| 107 | JOGKEX   | -1.307 |
| 108 | JOGKIB   | 1.101  |
| 109 | JOGKOH   | -2.122 |
| 110 | JOGKUN   | 1.723  |
| 111 | JOGLAU   | -2.551 |
| 112 | JOGLAU   | .221   |
| 113 | JOGLEY   | -.595  |
| 114 | JOGLOI   | -1.275 |
| 115 | JOMREL   | 2.723  |
| 116 | JOMRIP   | 7.915  |
| 117 | JOMRIP   | 8.617  |
| 118 | JOMVAL   | -1.423 |
| 119 | KAHDIF10 | -3.060 |
| 120 | KASWUW   | -.348  |
| 121 | KAXHUM   | 3.811  |
| 122 | KAYHOI   | -.770  |
| 123 | KEHLIS   | 2.809  |

|     |          |        |
|-----|----------|--------|
| 124 | KEHLOY   | .365   |
| 125 | KEYVOZ   | 28.022 |
| 126 | KEYVOZ   | 9.925  |
| 127 | KEYVOZ10 | 28.022 |
| 128 | KEYVOZ10 | 9.925  |
| 129 | KOBIW    | 1.156  |
| 130 | KOCRIF   | 2.896  |
| 131 | KOCRUR   | .000   |
| 132 | KOXVOI   | -4.074 |
| 133 | KUJHIH   | 1.528  |
| 134 | KUJHON   | 8.573  |
| 135 | KUJHUT   | 9.118  |
| 136 | KULJOS   | 4.925  |
| 137 | KUPVAT   | -3.029 |
| 138 | KUPVEX   | 4.382  |
| 139 | KUPVIB   | -3.592 |
| 140 | KUPVOH   | .465   |
| 141 | LAHQER   | -.402  |
| 142 | LAHQER   | .181   |
| 143 | LAXVEO   | -.643  |
| 144 | LEXGUR   | -2.837 |
| 145 | LEXGUR   | -8.349 |
| 146 | MAFCPR10 | -2.883 |
| 147 | MAQPUQ   | -1.984 |
| 148 | MAQQAX   | 3.597  |
| 149 | MAQQEB   | -1.566 |
| 150 | MAQQIF   | 7.276  |
| 151 | MAQQOL   | -4.751 |
| 152 | MAWREI   | 4.163  |
| 153 | MAWRIM   | 2.870  |
| 154 | MESJAV   | 2.914  |
| 155 | MOJHOI   | 9.856  |
| 156 | MOJHUO   | 1.847  |
| 157 | MOKLED   | 1.438  |
| 158 | MOPFUS   | -6.390 |
| 159 | MUCWIS   | 8.472  |
| 160 | MXCPDL   | 3.883  |
| 161 | MXCPDL   | 7.475  |
| 162 | MXCPDN   | -3.503 |
| 163 | NACTOB   | -2.921 |
| 164 | NACTUH   | 4.886  |
| 165 | NACVAP   | -1.875 |
| 166 | NACVAP   | 6.402  |
| 167 | NACVAP   | -2.946 |
| 168 | NACVAP   | -3.528 |
| 169 | NAVBIY   | -.608  |
| 170 | NICTID   | -3.388 |
| 171 | NICTID   | 7.379  |
| 172 | NIGCOV   | 8.182  |

|     |          |         |
|-----|----------|---------|
| 173 | NITMAF   | -2.258  |
| 174 | NOGGUN   | -.770   |
| 175 | NOLHOO   | -8.142  |
| 176 | NULKIQ   | 7.792   |
| 177 | OBIGIR   | -2.269  |
| 178 | OBIGIR01 | -6.735  |
| 179 | OBOLIB   | -.372   |
| 180 | ODUKON   | -5.978  |
| 181 | OHIWAD   | -.858   |
| 182 | OYISEW   | .241    |
| 183 | PETBIZ   | 2.795   |
| 184 | POSCEI   | .508    |
| 185 | POTNEU   | 3.261   |
| 186 | POTNIY   | -2.647  |
| 187 | POTNOE   | -3.273  |
| 188 | POTNUK   | 5.263   |
| 189 | POTNUK   | -8.712  |
| 190 | POTPAS   | -13.430 |
| 191 | POTVAY   | -26.184 |
| 192 | POTVAY   | 21.354  |
| 193 | POTVAY   | 21.987  |
| 194 | POTVAY   | 22.867  |
| 195 | POVLOC   | -11.930 |
| 196 | POVLOC   | -14.824 |
| 197 | PUKRIW   | 1.005   |
| 198 | PUNJIR   | -5.390  |
| 199 | PUNJOX   | 4.580   |
| 200 | QOCHAT   | 4.792   |
| 201 | QOCHEX   | .223    |
| 202 | QOCJEY   | 4.274   |
| 203 | QOCJEY01 | -4.024  |
| 204 | QOCJEY02 | 3.423   |
| 205 | QOCJID   | -3.134  |
| 206 | QOCJID   | 1.657   |
| 207 | QOCKEB   | .289    |
| 208 | QOCKIF   | -1.221  |
| 209 | RABYAX   | 4.475   |
| 210 | RABYEB   | .146    |
| 211 | RAVCOJ   | -22.521 |
| 212 | RAXDEB   | -4.920  |
| 213 | RAXDIF   | -4.177  |
| 214 | RAXDOL   | 5.833   |
| 215 | REPMEF   | 9.087   |
| 216 | REPMIJ   | 7.370   |
| 217 | RIFKIA   | -1.557  |
| 218 | RIZWAA   | -49.284 |
| 219 | ROPGUY   | 2.649   |
| 220 | RUKZAY   | 2.614   |
| 221 | RUQREA   | .321    |



|     |        |         |
|-----|--------|---------|
| 222 | RUQRIE | 1.294   |
| 223 | SEQVAL | 4.503   |
| 224 | SIDDAM | -16.329 |
| 225 | SIYKES | -5.983  |
| 226 | SIYKIW | -5.762  |
| 227 | SOQCAC | -3.611  |
| 228 | SOQCAC | -3.264  |
| 229 | TEGXIN | -8.549  |
| 230 | TEGXIN | -9.662  |
| 231 | TEJXAK | 5.107   |
| 232 | TEXPIW | 8.212   |
| 233 | TICFIX | -.247   |
| 234 | TICFUJ | -3.868  |
| 235 | TIPJIN | 1.760   |
| 236 | TUWRAG | -.376   |
| 237 | UDITAD | 14.550  |
| 238 | UDITIL | 12.562  |
| 239 | UDITOR | 11.169  |
| 240 | UJACEO | 7.042   |
| 241 | UJACOY | -6.050  |
| 242 | UMUZOT | -1.578  |
| 243 | URAJOO | -.666   |
| 244 | URAJUU | -.472   |
| 245 | URAKIJ | -.621   |
| 246 | URAKOP | .437    |
| 247 | URALIK | -.442   |
| 248 | UVODUG | -3.307  |
| 249 | UVODUG | -3.773  |
| 250 | UZOFOG | -1.767  |
| 251 | VAHHER | .337    |
| 252 | VAHNOH | -4.126  |
| 253 | VARPOT | 4.195   |
| 254 | VASSOX | -.406   |
| 255 | VATTUF | .756    |
| 256 | VIJFUP | 5.313   |
| 257 | VIQHEI | 4.268   |
| 258 | VIQHEI | 4.463   |
| 259 | VIQHEI | .880    |
| 260 | VIQHIM | -3.335  |
| 261 | VIQHIM | -5.857  |
| 262 | VIQHIM | -3.285  |
| 263 | VIQHIM | -5.615  |
| 264 | VIRCEH | -4.194  |
| 265 | VIRCEH | 5.652   |
| 266 | VIRCIL | 6.060   |
| 267 | VIRCIL | 7.999   |
| 268 | VIRCOR | 8.771   |
| 269 | VOCQUC | -.596   |
| 270 | VOKWEX | -10.200 |

|     |          |         |
|-----|----------|---------|
| 271 | VOZXEP   | 10.236  |
| 272 | VUWXUI   | -11.026 |
| 273 | WAWROB   | 11.882  |
| 274 | WELQUB   | -1.213  |
| 275 | WELQUB   | -1.266  |
| 276 | WEQDED   | 13.418  |
| 277 | WEQDIH   | 5.911   |
| 278 | WIWKIW   | -.400   |
| 279 | WIWKIW   | 6.467   |
| 280 | WOFXAR   | 4.822   |
| 281 | WOFXEV   | 4.916   |
| 282 | WOFXIZ   | -4.136  |
| 283 | WOFZAT   | -.025   |
| 284 | XALXEQ   | .293    |
| 285 | XALXIU   | .595    |
| 286 | XALXOA   | -1.408  |
| 287 | XAMJIE   | -1.783  |
| 288 | XAYGEM   | -7.986  |
| 289 | XEXHIS   | -6.519  |
| 290 | XICMOL   | -5.110  |
| 291 | XICMOL   | -8.867  |
| 292 | XICNAY   | -2.287  |
| 293 | XICNAY   | -2.831  |
| 294 | XICNAY   | -3.147  |
| 295 | XIGHUQ   | -.942   |
| 296 | XIMMAJ   | -2.779  |
| 297 | XIPQAR   | 3.664   |
| 298 | XIWHER   | -4.784  |
| 299 | XOFXIZ   | -13.521 |
| 300 | XOPYEH   | -3.564  |
| 301 | XOSNEY   | 4.386   |
| 302 | YABWAB   | -3.857  |
| 303 | YAWQOC   | -4.756  |
| 304 | YAWQUI   | 8.567   |
| 305 | YEJWIU   | -2.231  |
| 306 | YIQWOK   | .715    |
| 307 | YOWYOZ   | -.258   |
| 308 | YUBKUD   | -.311   |
| 309 | YUBLAK   | .150    |
| 310 | YUBLEO   | .563    |
| 311 | YUSXOZ   | 3.751   |
| 312 | YUSXOZ   | -1.217  |
| 313 | YUVGEB   | -1.822  |
| 314 | YUVGEB   | .758    |
| 315 | YUVGEB   | -1.239  |
| 316 | YUVGEB01 | -1.822  |
| 317 | YUVGEB01 | .758    |
| 318 | YUVGEB01 | -1.239  |
| 319 | YUWPAH   | -2.619  |

|     |          |         |
|-----|----------|---------|
| 320 | YUWPAH   | -10.051 |
| 321 | ZAJROR   | -.154   |
| 322 | ZAJROR   | -1.655  |
| 323 | ZAJRUX   | -2.634  |
| 324 | ZAZXIH   | -.690   |
| 325 | ZEDWUC   | 6.496   |
| 326 | ZEDXAJ   | -6.087  |
| 327 | ZEXFUD   | -1.597  |
| 328 | ZEXGAK   | -1.800  |
| 329 | ZOCBAU   | 1.222   |
| 330 | ZOLDIN   | .024    |
| 331 | ZOMVEF   | -6.676  |
| 332 | ZUXSEQ   | 4.300   |
| 333 | GUDDIV   | -11.026 |
| 334 | GUDDIV   | -7.888  |
| 335 | GUFROC   | 12.601  |
| 336 | GUFROC   | 7.462   |
| 337 | UHARUT   | -3.473  |
| 338 | PUTTOQ   | -5.155  |
| 339 | PUTTOQ   | -9.387  |
| 340 | YUHXOR   | -.715   |
|     | Nobs     | 340     |
|     | Mean     | .125    |
|     | SDSample | 7.149   |
|     | SDMean   | .388    |
|     | Minimum  | -49.284 |
|     | Maximum  | 29.751  |

**Table S3.** CSD search of metallabenzenes.

|                      |         |                |
|----------------------|---------|----------------|
| Number of structures |         | 123            |
| Nfrag                | Refcode | TOR M-C2-C3-C4 |
| 1                    | FOXTEU  | 1.037          |
| 2                    | NOWREZ  | 21.543         |
| 3                    | NOWRID  | 1.165          |
| 4                    | NOWROJ  | 1.637          |
| 5                    | NOWRUP  | 23.581         |
| 6                    | NOWSEA  | 1.137          |
| 7                    | NOWSOK  | .067           |
| 8                    | NOWSUQ  | .305           |
| 9                    | AKULAU  | 8.700          |
| 10                   | AYAMOE  | .452           |
| 11                   | AYANAR  | 10.976         |
| 12                   | BEKVUK  | 178.703        |
| 13                   | BIXHIB  | 5.503          |
| 14                   | BIXHOH  | 17.767         |
| 15                   | BIXHUN  | 13.181         |
| 16                   | BIXJAV  | 9.147          |
| 17                   | BIXJEZ  | 9.898          |

|    |          |        |
|----|----------|--------|
| 18 | BIXJOJ   | 6.962  |
| 19 | BIXTUY   | 12.503 |
| 20 | BIXVAG   | 2.154  |
| 21 | COQNIH   | 1.213  |
| 22 | COQNIH   | 4.765  |
| 23 | ETASUO   | 1.706  |
| 24 | ETATAV   | 3.836  |
| 25 | ETATEZ   | 23.539 |
| 26 | EVICAN   | 3.431  |
| 27 | EVICAN   | 4.938  |
| 28 | FEYVUC   | .013   |
| 29 | FIJPAR   | 9.369  |
| 30 | FILVOM   | 1.410  |
| 31 | FILWAZ   | 3.008  |
| 32 | FILWED   | 1.204  |
| 33 | GIFWEY   | 7.283  |
| 34 | GIFWIC   | 6.893  |
| 35 | GIFWOI   | 24.780 |
| 36 | GIFWOI   | 23.759 |
| 37 | GIXQIO   | 5.941  |
| 38 | GIXQIO01 | 5.941  |
| 39 | IHIXED   | .033   |
| 40 | IHIXIH   | 1.930  |
| 41 | IHIXON   | .147   |
| 42 | IHIXUT   | 3.201  |
| 43 | ILEZEE   | 19.953 |
| 44 | ILEZII   | 30.040 |
| 45 | ILEZII   | 30.522 |
| 46 | IZOKOX   | 9.704  |
| 47 | IZOKUD   | 1.789  |
| 48 | JAMWID   | 8.270  |
| 49 | JAMWID10 | 8.270  |
| 50 | JEGGEI   | 6.867  |
| 51 | JEGGIM   | 6.731  |
| 52 | JEGGUY   | 5.571  |
| 53 | JELSOJ   | 17.594 |
| 54 | JOJTAF   | 18.299 |
| 55 | JOJTEJ   | 16.841 |
| 56 | JOJTIN   | .247   |
| 57 | JOQWOD   | 15.727 |
| 58 | JUQMUD   | 2.191  |
| 59 | KEHNUH   | 3.605  |
| 60 | KEHPAP   | 20.642 |
| 61 | KISHEA   | 1.557  |
| 62 | KULJIM   | .706   |
| 63 | LIMKAT   | 3.966  |
| 64 | LIMMID   | 5.613  |
| 65 | MUXSEE   | 17.881 |
| 66 | MUXSEE   | 20.992 |

|     |        |        |
|-----|--------|--------|
| 67  | MUXSII | .684   |
| 68  | NIPZIV | 4.396  |
| 69  | NIPZOB | 1.572  |
| 70  | ODEFAG | 3.655  |
| 71  | ODEFEK | 2.992  |
| 72  | ODEFIO | 5.533  |
| 73  | OGOJAV | 1.571  |
| 74  | ONEPED | 2.145  |
| 75  | OYIZON | 7.777  |
| 76  | POMQAK | .818   |
| 77  | PUXVEL | 16.981 |
| 78  | PUXVIP | 11.031 |
| 79  | QIHBUH | 4.221  |
| 80  | QIHCAO | 8.858  |
| 81  | QOYKAR | 6.807  |
| 82  | QOYKOF | 4.923  |
| 83  | QOYKUL | 18.353 |
| 84  | QOYLAS | 7.212  |
| 85  | QUGHUW | 4.886  |
| 86  | QUGJAE | 1.771  |
| 87  | QUGJAE | 3.724  |
| 88  | RESYOE | 34.053 |
| 89  | RESYUK | 32.154 |
| 90  | RIFCEO | 1.942  |
| 91  | RIFCEO | 10.083 |
| 92  | RUDVUI | 10.741 |
| 93  | RUHSET | 5.204  |
| 94  | SILTIS | 2.176  |
| 95  | TAFHOA | .177   |
| 96  | TAFHUG | 3.478  |
| 97  | TAFJAO | 1.649  |
| 98  | TAFJES | 2.642  |
| 99  | TAFJIW | 2.144  |
| 100 | TAFJOC | .337   |
| 101 | TECHIU | 18.748 |
| 102 | TECHOA | 13.176 |
| 103 | TECJAO | 6.484  |
| 104 | TECJIW | 14.003 |
| 105 | TIPJAF | 5.678  |
| 106 | TIPJEJ | 6.748  |
| 107 | TUXROU | 13.940 |
| 108 | TUXRUA | 13.125 |
| 109 | UDIPEE | 4.385  |
| 110 | UDIPII | 10.555 |
| 111 | UDIRAC | 4.273  |
| 112 | UDIRAC | 5.143  |
| 113 | UGIBOC | 29.440 |
| 114 | UGIBOC | 29.476 |
| 115 | UGIBOC | 28.135 |

|     |        |        |
|-----|--------|--------|
| 116 | UGIBOC | 29.290 |
| 117 | UKIHAX | 1.239  |
| 118 | VOZXIT | 31.383 |
| 119 | VOZYEQ | 34.244 |
| 120 | VOZYIU | 23.867 |
| 121 | VOZYIU | 27.380 |
| 122 | VOZYIU | 29.392 |
| 123 | VOZYOA | 39.251 |
| 124 | VUGJUE | 6.600  |
| 125 | WEXTAW | 3.843  |
| 126 | WEXTEA | 3.118  |
| 127 | WOFZUN | 7.593  |
| 128 | WUSNAB | 7.394  |
| 129 | WUSNEF | 4.468  |
| 130 | YOTKOJ | .091   |
| 131 | YOTLAW | 8.895  |
| 132 | ZIHTUH | 5.450  |
| 133 | ZIHVAP | 28.112 |
| 134 | ZIHVET | 1.741  |
| 135 | ZOWMUV | 8.239  |
| 136 | WUCYEB | 21.304 |

|          |         |
|----------|---------|
| Nobs     | 136     |
| Mean     | 10.965  |
| SDSample | 17.370  |
| SDMean   | 1.489   |
| Minimum  | .013    |
| Maximum  | 178.703 |

**Table S4.** CSD search of bended metallacyclopentadienes M-C2-C3-C4 > 20°.

|                        |          |        |
|------------------------|----------|--------|
| Number of structures 6 |          |        |
| Nfrag                  | Refcode  | TOR1   |
| 2                      | HEJQOE   | 29.751 |
| 3                      | HXPAUP   | 23.748 |
| 4                      | KEYVOZ10 | 28.022 |
| 5                      | POTVAY   | 21.354 |
| 6                      | POTVAY   | 21.987 |
| 7                      | POTVAY   | 22.867 |
| 8                      | RAVCOJ   | 22.521 |
| 9                      | RIZWAA   | 49.284 |

|          |        |
|----------|--------|
| Nobs     | 9      |
| Mean     | 26.505 |
| SDSample | 9.162  |
| SDMean   | 3.054  |
| Minimum  | 19.011 |
| Maximum  | 49.284 |

**Table S5.** CSD search of bended metallabenzenes M-C2-C3-C4 > 20°.

Number of structures 18

| Nfrag | Refcode | TOR1   |
|-------|---------|--------|
| 1     | NOWREZ  | 21.543 |
| 2     | NOWRUP  | 23.581 |
| 3     | ETATEZ  | 23.539 |
| 4     | GIFWOI  | 24.780 |
| 5     | GIFWOI  | 23.759 |
| 6     | ILEZEE  | 25.585 |
| 7     | ILEZII  | 30.040 |
| 8     | ILEZII  | 30.522 |
| 9     | KEHPAP  | 20.642 |
| 10    | MUXSEE  | 20.992 |
| 11    | QOYKUL  | 25.853 |
| 12    | RESYOE  | 34.053 |
| 13    | RESYUK  | 32.154 |
| 14    | UGIBOC  | 29.440 |
| 15    | UGIBOC  | 29.476 |
| 16    | UGIBOC  | 28.135 |
| 17    | UGIBOC  | 29.290 |
| 18    | VOZXIT  | 31.383 |
| 19    | VOZYEQ  | 34.244 |
| 20    | VOZYIU  | 23.867 |
| 21    | VOZYIU  | 27.380 |
| 22    | VOZYIU  | 29.392 |
| 23    | VOZYOA  | 39.251 |
| 24    | ZIHVAP  | 28.112 |
| 25    | WUCYEB  | 21.304 |

|          |        |
|----------|--------|
| Nobs     | 25     |
| Mean     | 27.533 |
| SDSample | 4.696  |
| SDMean   | .939   |
| Minimum  | 20.642 |
| Maximum  | 39.251 |

**Table S6.** CSD search of 16e d<sup>8</sup> metallacyclopentadienes.

Number of structures 30

| Nfrag | Refcode | DIST M-C2 |
|-------|---------|-----------|
| 1     | DUGHAQ  | 2.071     |
| 2     | DUGHEU  | 2.039     |
| 3     | GIBWIY  | 2.060     |
| 4     | IDATAJ  | 2.053     |
| 5     | IFAVUG  | 2.024     |
| 6     | IFAVUG  | 2.029     |
| 7     | IHUTUA  | 2.041     |
| 8     | KASWUW  | 2.020     |
| 9     | LAXVEO  | 2.007     |
| 10    | MAQPUQ  | 1.986     |

|    |        |       |
|----|--------|-------|
| 11 | MAQQAX | 2.002 |
| 12 | MAQQEB | 2.019 |
| 13 | MAQQIF | 2.047 |
| 14 | MAQQOL | 2.037 |
| 15 | MAWREI | 2.040 |
| 16 | MAWRIM | 2.013 |
| 17 | MOPFUS | 2.000 |
| 18 | MXCPDL | 1.985 |
| 19 | MXCPDL | 1.981 |
| 20 | NACTOB | 2.009 |
| 21 | NACTUH | 2.066 |
| 22 | NACVAP | 1.977 |
| 23 | NACVAP | 2.004 |
| 24 | NACVAP | 1.991 |
| 25 | NACVAP | 2.004 |
| 26 | NOLHOO | 2.079 |
| 27 | NULKIQ | 2.030 |
| 28 | PUNJIR | 2.008 |
| 29 | PUNJOX | 2.024 |
| 30 | SIDDAM | 1.977 |
| 31 | UZOFOG | 2.020 |
| 32 | WIWKIW | 2.000 |
| 33 | WIWKIW | 2.041 |
| 34 | XIGHUQ | 2.078 |
| 35 | YABWAB | 2.073 |
| 36 | ZOMVEF | 2.065 |

|          |       |
|----------|-------|
| Nobs     | 36    |
| Mean     | 2.025 |
| SDSample | .030  |
| SDMean   | .005  |
| Minimum  | 1.977 |
| Maximum  | 2.079 |

**Table S7.** CSD search of 16e d<sup>0</sup> metallacyclopentadienes.

|                      |         |       |
|----------------------|---------|-------|
| Number of structures |         | 94    |
| Nfrag                | Refcode | DIST1 |
| 1                    | AJEBAU  | 2.280 |
| 2                    | AJOGIP  | 2.241 |
| 3                    | AJOGOV  | 2.278 |
| 4                    | ASASIX  | 2.271 |
| 5                    | BODQUG  | 2.162 |
| 6                    | CEQFEJ  | 2.245 |
| 7                    | CPPHZR  | 2.249 |
| 8                    | CPTPHF  | 2.190 |
| 9                    | CPTPTI  | 2.141 |
| 10                   | DAVZIJ  | 2.282 |
| 11                   | EFIPUE  | 2.192 |
| 12                   | EFIPUE  | 2.207 |



|    |          |       |
|----|----------|-------|
| 13 | FEZDUJ   | 2.204 |
| 14 | FEZDUJ   | 2.211 |
| 15 | FEZFAR   | 2.217 |
| 16 | FOPDOF   | 2.139 |
| 17 | FUDGUH   | 2.270 |
| 18 | FUDHAO   | 2.253 |
| 19 | FUDHIW   | 2.231 |
| 20 | GABJIC   | 2.250 |
| 21 | GABJIC   | 2.260 |
| 22 | GECWUG   | 2.215 |
| 23 | GIJRAV   | 2.288 |
| 24 | HEJQOE   | 2.242 |
| 25 | HIJFUD   | 2.248 |
| 26 | HIJFUD   | 2.252 |
| 27 | HOCTAV   | 2.267 |
| 28 | HOCTEZ   | 2.221 |
| 29 | HOYPOB   | 2.327 |
| 30 | ICUKAS   | 2.270 |
| 31 | IDUYEN   | 2.264 |
| 32 | IFIZAA   | 2.250 |
| 33 | JAYLEA   | 2.310 |
| 34 | JAYLIE   | 2.324 |
| 35 | JAYLOK   | 2.290 |
| 36 | KAYHOI   | 2.157 |
| 37 | KEHLIS   | 2.264 |
| 38 | KEHLOY   | 2.245 |
| 39 | KOBIW    | 2.250 |
| 40 | KOCRIF   | 2.259 |
| 41 | KOCRUR   | 2.255 |
| 42 | KUJHIH   | 2.241 |
| 43 | KUJHON   | 2.257 |
| 44 | KUJHUT   | 2.222 |
| 45 | MOKLED   | 2.259 |
| 46 | NIGCOV   | 2.159 |
| 47 | OBIGIR   | 2.279 |
| 48 | OBIGIR01 | 2.271 |
| 49 | OBOLIB   | 2.240 |
| 50 | ODUKON   | 2.236 |
| 51 | POSCEI   | 2.146 |
| 52 | POTNEU   | 2.253 |
| 53 | POTNIY   | 2.270 |
| 54 | POTNOE   | 2.268 |
| 55 | POTNUK   | 2.247 |
| 56 | POTNUK   | 2.245 |
| 57 | POTPAS   | 2.268 |
| 58 | POTVAY   | 2.249 |
| 59 | POTVAY   | 2.255 |
| 60 | POTVAY   | 2.265 |
| 61 | POTVAY   | 2.266 |

|     |          |       |
|-----|----------|-------|
| 62  | POVLOC   | 2.264 |
| 63  | POVLOC   | 2.277 |
| 64  | PUKRIW   | 2.254 |
| 65  | QOCHAT   | 2.234 |
| 66  | QOCHEX   | 2.225 |
| 67  | QOCJID   | 2.242 |
| 68  | QOCJID   | 2.247 |
| 69  | RAVCOJ   | 2.235 |
| 70  | RIZWAA   | 2.134 |
| 71  | SOQCAC   | 2.264 |
| 72  | SOQCAC   | 2.251 |
| 73  | TEXPIW   | 2.244 |
| 74  | UJACEO   | 2.269 |
| 75  | UJACOY   | 2.301 |
| 76  | UVODUG   | 2.258 |
| 77  | UVODUG   | 2.267 |
| 78  | VAHNOH   | 2.160 |
| 79  | VARPOT   | 2.271 |
| 80  | VASSOX   | 2.240 |
| 81  | VIQHEI   | 2.265 |
| 82  | VIQHEI   | 2.255 |
| 83  | VIQHEI   | 2.269 |
| 84  | VIQHIM   | 2.221 |
| 85  | VIQHIM   | 2.264 |
| 86  | VIQHIM   | 2.228 |
| 87  | VIQHIM   | 2.261 |
| 88  | VOCQUC   | 2.263 |
| 89  | WAWROB   | 2.171 |
| 90  | WOFXAR   | 2.249 |
| 91  | WOFXEV   | 2.271 |
| 92  | WOFXIZ   | 2.239 |
| 93  | WOFZAT   | 2.235 |
| 94  | XICMOL   | 2.263 |
| 95  | XICMOL   | 2.254 |
| 96  | XICNAY   | 2.271 |
| 97  | XICNAY   | 2.249 |
| 98  | XICNAY   | 2.250 |
| 99  | XIPQAR   | 2.145 |
| 100 | XIWHER   | 2.275 |
| 101 | XOSNEY   | 2.279 |
| 102 | YAWQOC   | 2.245 |
| 103 | YAWQUI   | 2.251 |
| 104 | YIQWOK   | 2.241 |
| 105 | YOWYOZ   | 2.257 |
| 106 | YUVGEB   | 2.248 |
| 107 | YUVGEB   | 2.238 |
| 108 | YUVGEB   | 2.245 |
| 109 | YUVGEB01 | 2.248 |
| 110 | YUVGEB01 | 2.238 |

|     |          |       |
|-----|----------|-------|
| 111 | YUVGEB01 | 2.245 |
| 112 | YUWPAH   | 2.241 |
| 113 | YUWPAH   | 2.247 |
| 114 | ZAJROR   | 2.257 |
| 115 | ZAJROR   | 2.228 |
| 116 | ZAJRUX   | 2.197 |
| 117 | ZOCBAU   | 2.148 |
| 118 | ZOLDIN   | 2.157 |
| 119 | GUFLOC   | 2.238 |
| 120 | GUFLOC   | 2.242 |
| 121 | PUTTOQ   | 2.280 |
| 122 | PUTTOQ   | 2.288 |

|          |       |
|----------|-------|
| Nobs     | 122   |
| Mean     | 2.243 |
| SDSample | .038  |
| SDMean   | .003  |
| Minimum  | 2.134 |
| Maximum  | 2.327 |
